1  
2  
3  
4  
5  
6  
7  
8  
9  
10  
11  
12  
13  
14  
15  
16  
17  
18  
19  
20  
21  
22  
23  
24  
25  
26

## TITLE

**A facility and community-based assessment of scabies in rural Malawi**

**SHORT TITLE: Scabies control in Malawi**

## AUTHORS AND AFFILIATIONS

Cristina Galván-Casas<sup>1\*</sup>; Oriol Mitjá<sup>2</sup>; Sara Esteban-Terradillos<sup>3</sup>; Jacob Kafulafula<sup>4</sup>;  
Texon Phiri<sup>5</sup>; Íñigo Navarro-Fernández<sup>6</sup>; Concepción Román-Curto<sup>7</sup>; Hassani Mtenje<sup>8</sup>;  
Gerald Thauzeni<sup>9</sup>; Elizabeth Harawa<sup>10</sup>; Stephano Kaluzi<sup>11</sup>; Mphatso Diere<sup>12</sup>; Mary  
Mkandawire<sup>13</sup>; Shaibu Malizani<sup>14</sup>; Alex Chifundo<sup>15</sup>; Marta Utrera-Busquets<sup>16</sup>; Mónica  
Roncero-Riesco<sup>17</sup>; Sara López Martín-Prieto<sup>18</sup>; Iosune Vilanova-Urdániz<sup>19</sup>; Gisela H.  
Petiti<sup>20</sup>; María Victoria de Gálvez Aranda<sup>21</sup>; Nuria No Pérez<sup>22</sup>; María Rueda Gómez-  
Calcerrada<sup>23</sup>; Pilar Iranzo<sup>24</sup>; Pilar Escalonilla García-Patos<sup>25</sup>; Magdalena de Troya-  
Martín<sup>26</sup>; Javier Romero Gomez<sup>27</sup>; Esther Cardeñoso-Alvarez<sup>28</sup>; Sofia Lucas Truyols<sup>29</sup>;  
Libe Aspe Unanue<sup>30</sup>; Cristina Bajo del Pozo<sup>31</sup>; Alicia Comunión Artieda<sup>32</sup>; Maria Isabel  
Martínez González<sup>33</sup>; Omar F López-López<sup>34</sup>; Esther Moreno-Artero<sup>35</sup>; Xavier Cubiró<sup>36</sup>;  
Iago Meilán-Sánchez<sup>37</sup>; Alejandra Tomás-Velázquez<sup>38</sup>; Cristina López-Sánchez<sup>39</sup>; Eva  
M Sánchez-Martínez<sup>40</sup>; Harrison A Edwards<sup>41</sup>; Maria Herrera Morueco<sup>42</sup>; Julia Zehe  
Rubiera<sup>43</sup>; Laura Salguero Caldera<sup>44</sup>; Urbano Blanes-Moreno<sup>45</sup>; Maria Uribarren-  
Movilla<sup>46</sup>; Michael Marks<sup>47</sup>

<sup>1</sup> Faculty of Medicine and Health Sciences, Universitat de Barcelona, Barcelona, Spain.  
Department of Dermatology. Hospital Universitario de Mostoles, Madrid, Spain.  
DerMalawi Project, Nkhotakota, Malawi.

<sup>2</sup> Fight AIDS and Infectious Diseases Foundation, Badalona, Spain. Hospital Universitari  
Germans Trias i Pujol, Badalona Spain. Lihir Medical Centre-International SOS, Lihir

NOTE: This preprint reports new research that has not been certified by peer review and should not be used to guide clinical practice.

- 27 <sup>3</sup> Department of Dermatology. Hospital Universitario de Cruces, Bilbao, Bizkaia, Spain.
- 28 <sup>4</sup> Chief Medical Office. Nkhotakota District Hospital. Malawi.
- 29 <sup>5</sup> Community programs manager. Alinafe Health Center. Malawi
- 30 <sup>6</sup> Department of Dermatology. Hospital Universitario de Cabueñes. Gijón. Spain.
- 31 <sup>7</sup> Department of Dermatology. Complejo Hospitalario Universitario de Salamanca. Spain.
- 32 <sup>8</sup> Health Surveillance Assistant. Alinafe Health Center. Nkhotakota. Malawi
- 33 <sup>9</sup> Health Surveillance Assistant. Mwansambo Health Center. Nkhotakota. Malawi
- 34 <sup>10</sup> Health Surveillance Assistant. Kapiri. Nkhotakota. Malawi
- 35 <sup>11</sup> Health Surveillance Assistant. Benga Health Center. Nkhotakota. Malawi
- 36 <sup>12</sup> Health Surveillance Assistant. Thavite Health Center. Salima. Malawi
- 37 <sup>13</sup> Data Clerk. Alinafe Health Center. Nkhotakota. Malawi
- 38 <sup>14</sup> Data Clerk. Alinafe Health Center. Nkhotakota. Malawi
- 39 <sup>15</sup> Counselor. Alinafe Health Center. Nkhotakota. Malawi
- 40 <sup>16</sup> Department of Dermatology. Hospital General La Mancha Centro. Ciudad Real. Spain.
- 41 <sup>17</sup> Department of Dermatology. Complejo Asistencial Universitario de Salamanca. Spain.
- 42 <sup>18</sup> Department of Dermatology. Hospital Virgen del Rocio. Sevilla. Spain.
- 43 <sup>19</sup> Department of Dermatology. Hospital General Universitario de Elche. Alicante. Spain.
- 44 <sup>20</sup> Department of Dermatology. Hospital Mòisses Broggi. Barcelona. Spain.
- 45 <sup>21</sup> Department of Dermatology. Faculty of Medicine. Universidad de Málaga. Spain
- 46 <sup>22</sup> Department of Dermatology. Complejo hospitalario Universitario de Vigo. Spain.
- 47 <sup>23</sup> Department of Dermatology. Hospital Viamed Virgen de la Paloma. Madrid. Spain.
- 48 <sup>24</sup> Department of Dermatology. Hospital Clínic. Barcelona. Spain.

- 49 <sup>25</sup> Department of Dermatology. Complejo Asistencial de Ávila. Spain.
- 50 <sup>26</sup> Department of Dermatology. Hospital Costa del Sol. Marbella. Spain.
- 51 <sup>27</sup> Department of Dermatology. Hospital Quironsalud. Málaga. Spain.
- 52 <sup>28</sup> Department of Dermatology. Complejo Asistencial Universitario de Salamanca. Spain.
- 53 <sup>29</sup> Department of Dermatology. Consorci Hospital General Universitari de València.
- 54 Spain.
- 55 <sup>30</sup> Department of Dermatology. Hospital Universitario Araba. Vitoria-Gasteiz. Spain.
- 56 <sup>31</sup> Department of Dermatology. Complejo Hospitalario de Palencia. Spain
- 57 <sup>32</sup> Department of Dermatology. Centro de Diagnóstico Médico. Ayuntamiento de Madrid.
- 58 Spain.
- 59 <sup>33</sup> Department of Dermatology. Hospital Universitario Araba. Vitoria-Gasteiz. Spain.
- 60 <sup>34</sup> Department of Dermatology. Complejo Hospitalario Universitario A Coruña. Spain.
- 61 <sup>35</sup> Department of Dermatology. Clínica Universidad de Navarra. Madrid. Spain.
- 62 <sup>36</sup> Department of Dermatology. Hospital de la Santa Creu i Sant Pau, Barcelona. Spain.
- 63 <sup>37</sup> Department of Dermatology. Complejo Hospitalario Universitario A Coruña. Spain.
- 64 <sup>38</sup> Department of Dermatology. Clínica Universidad de Navarra. Pamplona. Spain.
- 65 <sup>39</sup> Department of Dermatology. Hospital de la Santa Creu i Sant Pau, Barcelona. Spain.
- 66 <sup>40</sup> Department of Dermatology. Hospital Universitario Doctor Peset. Valencia. Spain.
- 67 <sup>41</sup> Princess Alexandra Hospital. School of Public Health, University of Queensland.
- 68 Dermatology Research Centre, University of Queensland Diamantina Institute. Brisbane.
- 69 Australia
- 70 <sup>42</sup> Medicine Department. Hospital Universitario Infanta Leonor. Madrid. Spain.
- 71 <sup>43</sup> Hospital Plató. Barcelona. Spain.

72 <sup>44</sup> Hospital Universitario Germans Trias y Pujol. Barcelona. Spain.

73 <sup>45</sup> Francisco de Vitoria University. Madrid. Spain

74 <sup>46</sup> Alcalá University. Madrid. Spain

75 <sup>47</sup> Clinical Research Department, Faculty of Infectious and Tropical Diseases, London

76 School of Hygiene & Tropical Medicine, London, United Kingdom

77 **\*Corresponding author:**

78 **E-mail:** [galvancasascristina@gmail.com](mailto:galvancasascristina@gmail.com)

79 <https://orcid.org/0000-0002-9662-9537>

80

81

82

83 **ABSTRACT**

84 **Background:**

85 Scabies is a neglected tropical disease of the skin, causing severe itching, stigmatizing  
86 skin lesions and systemic complications. Since 2015, the DerMalawi project provides an  
87 integrated skin diseases clinics and Tele-dermatology care in Malawi. Clinic-based data  
88 suggested a progressive increase in scabies cases observed. To better identify and treat  
89 individuals with scabies in the region, we shifted from a clinic-based model to a  
90 community-based outreach programme.

91 **Methods:**

92 From May 2015, DerMalawi project provide integrated skin diseases and Tele-  
93 dermatological care in the Nkhotakota and Salima health districts in Malawi.  
94 Demographic and clinical data of all patients personally attended are recorded. Due to a

95 progressive increase in the number of cases of scabies the project shifted to a  
96 community-based outreach programme.

97 For the community outreach activities, we conducted three visits between 2018 to 2019  
98 and undertook screening in schools and villages of Alinafe Hospital catchment area.  
99 Treatment was offered for all the cases and school or household contacts.

100 **Results:** Scabies increased from 2.9% to 39.2% of all cases seen by the DerMalawi  
101 project at clinics between 2015 to 2018. During the community-based activities  
102 approximately 50% of the population was assessed in each of three visits. The  
103 prevalence of scabies was similar in the first two rounds, 15.4% (2392) at the first visit  
104 and 17.2% at the second visit. The prevalence of scabies appeared to be lower (2.4%)  
105 at the third visit. The prevalence of impetigo appeared unchanged and was 6.7% at the  
106 first visit and 5.2% at the final visit.

107 **Conclusions:** Prevalence of scabies in our study setting was very high suggesting that  
108 scabies is a major public health problem in parts of Malawi. Further work is required to  
109 more accurately assess the burden of disease and develop appropriate public health  
110 strategies for its control.

111

112

113 **PLAIN ENGLISH SUMMARY:**

114 Scabies is an infestation of the skin caused by a mite. There is limited data on how  
115 common scabies is in sub-Saharan Africa, including Malawi. The DerMalawi project has  
116 been providing care for dermatological conditions in rural Malawi since 2015. Between  
117 2015 and 2018 we observed an increase in patients with scabies attending for treatment.  
118 In response, the project shifted from providing care at clinics to an approach using  
119 community-based outreach.

120 Between 2018 and 2019 we conducted community-based activities on three occasions  
121 in an area of approximately 30,000 individuals. The DerMalawi team visited schools  
122 and villages to identify and treat cases of scabies and their contacts. We were able to  
123 examine about 50% of the population on each visit.

124 Initially a large proportion of the population had scabies (15%) and this was similar  
125 during our second community survey. At our third survey this appeared to have  
126 decreased to 2% but it is difficult for us to know if this is because of treatment given in  
127 the previous rounds.

128 Scabies is a major problem in rural populations in Malawi and public health strategies  
129 are needed to reduce the disease burden.

130

131 **Keywords:** Scabies. Impetigo. Active case detection. Ivermectin (IVM). Permethrin  
132 (PMT).

133

134 **Background:**

135 Scabies is a skin disease caused by infestation with the mite, *Sarcoptes scabiei* var.  
136 *Hominis*. Human transmission is predominantly via skin-to-skin contact. Around 200-300  
137 million people are affected each year [1,2], particularly among poor populations living in

138 crowded conditions in tropical areas. There are limited data on the epidemiology of  
139 scabies in sub-Saharan Africa and in particular limited population level estimates of  
140 disease prevalence.

141 Permethrin 5% topical ointment is widely considered the first line drug for treatment of  
142 individuals with scabies [3] but there is increasing evidence that community wide  
143 treatment with ivermectin is the best strategy for control in highly endemic areas. The  
144 major challenge to the use of ivermectin is the current recommendation for two  
145 separated doses and its relative contraindication in pregnant and breastfeeding women  
146 and children under five years of age.[4–9].

147 Standard guidelines for scabies control are based on treatment of cases and contacts  
148 [10], but this approach is not effective in highly-endemic areas [11] [12,13] . Different  
149 mass treatment approaches have resulted in positive outcomes [14–16] Mass drug  
150 administration of ivermectin as part of lymphatic filariasis control in Zanzibar was  
151 associated with a 68% decrease of scabies treatment's prescription [17]. The first  
152 comparative trial of mass drug administration for scabies was the Skin Health  
153 Intervention Fiji Trial (SHIFT) which found that ivermectin-based mass drug  
154 administration decreased the prevalence of scabies by 94% one year after the  
155 intervention, and was superior to both mass drug administration of topical permethrin  
156 and standard care [18].

157 Better data is needed on the epidemiology of scabies in sub-Saharan Africa. We report  
158 both facility based and community-based data on scabies in rural Malawi, collected as  
159 part of the DerMalawi project.

160

161

162 **Methods**

163 **Ethics Statement**

164 Data reported were routinely collected as part of the activities of the DerMalawi project.  
165 The DerMalawi project was established in May 2015 to provide free, integrated skin  
166 diseases care and Tele-dermatological consultations to communities in the Nkhotakota  
167 and Salima health districts in Malawi. The DerMalawi project is governed by a  
168 memorandum of understanding between a group of Spanish dermatologists and the  
169 Malawian Health authorities with approval for all activities in the district granted by the  
170 Nkhotakota health authorities. Patients give verbal consent when attending the  
171 DerMalawi project for an assessment of their skin problems. Approval from the Malawi  
172 Medical Council and District Hospital for the DerMalawi project are available in  
173 supporting information.

174 **Clinic-Based Data Collection**

175 Since the beginning of the DerMalawi project, the demographic and clinical data of all  
176 patients personally attended are recorded in spreadsheets, using tablets. Among the  
177 clinical data we collected personal and family history, symptoms, dermatological  
178 examination, complementary examinations performed, coded diagnosis (ICD-10) and  
179 prescribed and administered treatment. This data included basic information on the  
180 number of individuals assessed and the number of cases of major common skin  
181 conditions including scabies, leprosy, fungal infections, ulcers, albinism and skin cancer.  
182 During the period between May 2015 to March 2018, clinic-based data suggested that  
183 there had been a progressive increase in the proportion and absolute number of cases  
184 of scabies that we observed. In response to this observed increase in scabies cases, the  
185 DerMalawi project in collaboration with the Malawi health and educational authorities  
186 agreed to shift from a clinic-based model to a community-based outreach programme to  
187 try and better identify and treat individuals with scabies in the region.



188

189 Community Based-Data Collection

190 The community outreach activities took place in the Alinafe Health Center catchment  
191 area, Nkhotakota and Salima districts, Malawi, which has a population of approximately  
192 30,000 individuals. The area has 14 schools, 94 villages and five health facilities. For the  
193 purpose of project implementation, the zone was divided into basic units of action,  
194 formed by schools and the villages related to each school center. Community  
195 dermatology outreach activities were conducted in both schools and communities. Data  
196 for the community outreach activities were collected at a community level during the  
197 delivery of an active case search and treatment programme in schools and villages of  
198 Alinafe Hospital catchment area from July 2018 through April 2019. The programme was  
199 conducted in three rounds three and six months apart in July 2018, Oct 2018 and April  
200 2019.

201 Outreach activities were administered to the population of 14 schools and 94 villages on  
202 catch-all basis in a subsection of the catchment area normally covered by the DerMalawi  
203 clinic-based service. Clinical teams visited the schools, class by class, and in villages  
204 attempted to go house by house trying to reach all individuals present at the school or at  
205 home. The teams combined Spanish dermatologists, staff from Alinafe Hospital, trained  
206 Chichewa-English translators, community health managers and a local guide. Groups  
207 were composed by enough males and females to ensure confidentiality during the skin  
208 exam of individuals of both sexes. A week before each round we conducted health  
209 awareness in the communities to educate the public to the program's aims through health  
210 educators who disseminated information about scabies at community meetings, school  
211 meetings and through public notices, pamphlets and posters in cooperation with village  
212 leaders. As with our clinic-based data collection we collected based information on the  
213 number of individuals seen, demographics but focused clinical examination on scabies  
214 and impetigo in view of the marked increase we had seen at the health facility.

215

216 Examination:

217 In both clinic and community settings a dermatologist carried out a standardized whole  
218 skin examination (including genitalia and buttocks – using tents to ensure).  
219 Determination of scabies intensity was based on the number of lesions in categories of  
220 mild ( $\leq 10$ ), moderate (11 to 49), and severe ( $\geq 50$ ).

221

222 Treatment:

223 At both the clinic and in the community, all individuals diagnosed of scabies were offered  
224 one dose of oral ivermectin (200  $\mu\text{g}$  per kilogram of body weight), which was taken under  
225 the direct observation of study staff. Ivermectin was replaced with topical permethrin  
226 cream in the following participants: children who weighed less than 15 kg, women who  
227 were pregnant or breast-feeding. For participants who had scabies at baseline, a second  
228 dose of the medication that had been provided at baseline was distributed by study staff  
229 7 at spot-check sites; individuals were advised to attend the clinic. We attempted to  
230 provide treatment to all class-mates where cases of scabies were found during school  
231 visits and to the household of cases of found during either school or household visits.

232

233 Analysis:

234 For clinic-based data we report the absolute number of cases of scabies and the  
235 proportion of all skin problems seen that were due to scabies. For the community data  
236 we report the prevalence of scabies (with and without secondary bacterial infection), for  
237 each school area, and the overall intervention area.

238

239

240 **Results**

241 The population living in the catchment area of the Alinafe Health Centre is estimated at  
242 29,780 people (2018 census). Between May 2015 and March 2018, the DerMalawi  
243 Project conducted 4 health centre-based clinics at which a total of 4,769 people were  
244 seen. The number of people seen increased at each skin visit over the period. The  
245 proportion and absolute number of scabies diagnosed increased with 13 (2.8%) cases  
246 in 2015, 9 (1.9%) in 2016, 146 (14.5%) in 2017 and 792 (38.7%) in 2018 but there were  
247 not significant changes in the proportion of cases of other key conditions such as leprosy,  
248 impetigo, tumours or fungal infections (Table 1).

| <b>Diagnosis</b>      | <b>2015</b> | <b>2016</b> | <b>2017</b> | <b>2018</b> |
|-----------------------|-------------|-------------|-------------|-------------|
| <b>Scabies</b>        | 13 (2.9%)   | 9 (1.2%)    | 146 (15.2%) | 792 (39.2%) |
| <b>Leprosy</b>        | 5 (1.1%)    | 6 (0.8%)    | 10 (1.0%)   | 4 (0.2%)    |
| <b>Impetigo</b>       | 18 (3.9%)   | 24 (3.1%)   | 27 (2.8%)   | 46(2.3%)    |
| <b>Skin ulcer</b>     | 3 (0.7%)    | 4(0.5%)     | 8 (0.8%)    | 30 (1.5%)   |
| <b>Tumor</b>          | 16 (3.5%)   | 28 (3.6%)   | 40 (4.2%)   | 33 (1.6%)   |
| <b>Fungal disease</b> | 192 (42.1%) | 243(31.3%)  | 334 (34.8%) | 536 (26.6%) |
| <b>Total</b>          | 456         | 776         | 960         | 2018        |

249 Table 1: Cases seen during clinic-based activities

250

251 Community visits took place between July 2018 and April 2019. We saw 15,290  
252 individuals (51.3% of the population) on our first community visit in July 2018, 16,619  
253 individuals (55.8%) on our second community visit in October 2018, and 12,617  
254 individuals (42.4%) during our third community visit in April 2019 (Table 2).

255

256

257

|                  |          | <b>July 2018<br/>(N=15487)</b> | <b>October 2018<br/>(N=16619)</b> | <b>April 2019<br/>(N=12617)</b> |
|------------------|----------|--------------------------------|-----------------------------------|---------------------------------|
| <b>Age Group</b> | 0-4yrs   | 2384 (15.4%)                   | 1894 (11.4%)                      | 2143 (17.0%)                    |
|                  | 5-9yrs   | 3411 (22.0%)                   | 4242 (25.5%)                      | 2626 (20.8%)                    |
|                  | 10-14yrs | 3994 (25.8%)                   | 5490 (33.0%)                      | 2933 (23.2%)                    |
|                  | 15-24yrs | 2402 (15.5%)                   | 2259 (13.6%)                      | 2033 (16.1%)                    |
|                  | 24-34yrs | 1344 (8.7%)                    | 1106 (6.7%)                       | 1120 (8.9%)                     |
|                  | >=35yrs  | 1952 (12.6%)                   | 1628 (9.8%)                       | 1762 (14.0%)                    |
| <b>Gender</b>    | Female   | 8714 (56.3%)                   | 9152 (55.1%)                      | 7246 (57.4%)                    |
|                  | Male     | 6773 (43.7%)                   | 7467 (44.9%)                      | 5371 (42.6%)                    |
| <b>Scabies</b>   | Absent   | 13095 (84.6%)                  | 13764 (82.8%)                     | 12314 (97.6%)                   |
|                  | Present  | 2392 (15.4%)                   | 2855 (17.2%)                      | 303 (2.4%)                      |
| <b>Impetigo</b>  | Absent   | 14455 (93.3%)                  | 15915 (95.8%)                     | 11959 (94.8%)                   |
|                  | Present  | 1032 (6.7%)                    | 704 (4.2%)                        | 658 (5.2%)                      |

258 Table 2: Individuals seen during community-based activities

259

260 The prevalence of scabies was similar during our first two community visits; 15.4%  
 261 (2392) in July 2018 and 17.2% (2855) in October 2018 but only 2.4% in April 2019. All  
 262 individuals diagnosed with scabies received treatment with IVM but only 47% of cases  
 263 seen in the first community visit, and only 55% of cases seen in during the second  
 264 community visit were seen for a second dose of treatment. As well as index cases, 5,204  
 265 individuals and 7,888 individuals received treatment as contacts during these visits.  
 266 Prevalence of impetigo was 6.7% (1032), 4.2% (704), and 5.2% (658) across the three

267 visits. At each community visit the prevalence of scabies varied markedly between  
268 villages (range 5-40%, Figure 1). The prevalence of scabies was highest amongst  
269 children under 5 (Table 3) at each visit.

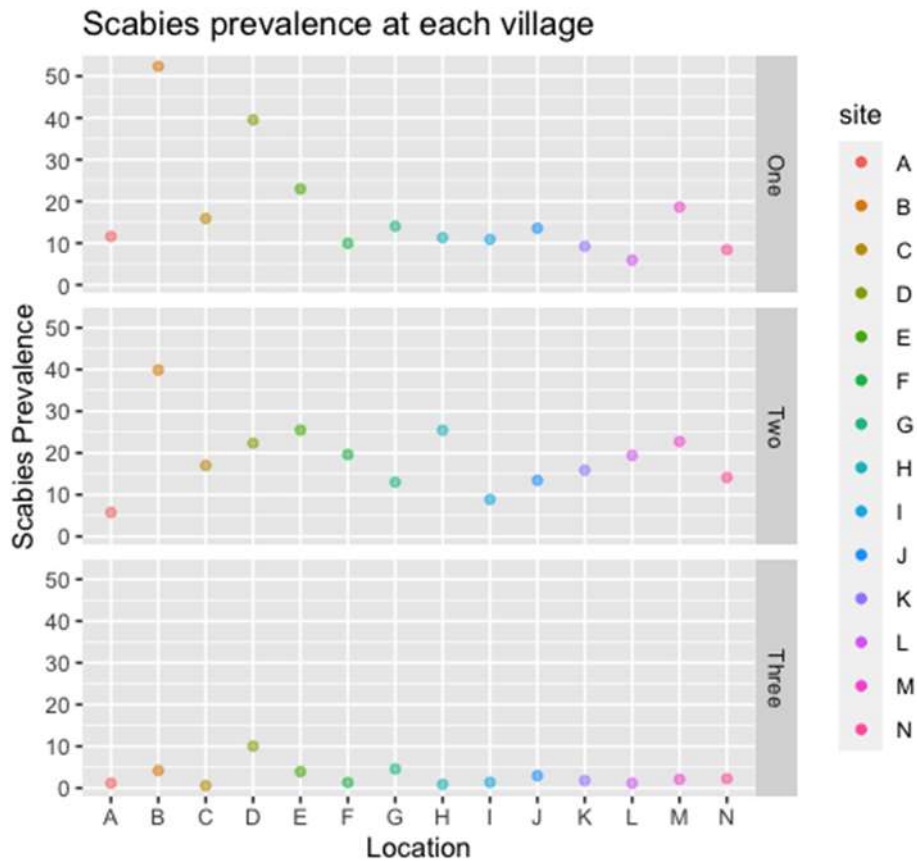

270

Figure 1

271 Figure 1

272

273

274

275

276

277

278

|           | Visit 1               |                        | Visit 2               |                        | VISIT 3               |                        |
|-----------|-----------------------|------------------------|-----------------------|------------------------|-----------------------|------------------------|
| Age Group | Prevalence of Scabies | Prevalence of Impetigo | Prevalence of Scabies | Prevalence of Impetigo | Prevalence of Scabies | Prevalence of Impetigo |
| 0-4       | 20.6%                 | 10.5%                  | 22.3%                 | 5.6%                   | 4%                    | 6.1%                   |
| 5-9       | 15.9%                 | 7.9%                   | 18.2%                 | 5.2%                   | 3.2%                  | 9.2%                   |
| 10-14     | 15.8%                 | 7.2%                   | 18.7%                 | 4.7%                   | 2.8%                  | 7.1%                   |
| 15-24     | 14.8%                 | 5.2%                   | 15.3%                 | 3.3%                   | 1.3%                  | 2.9%                   |
| 24-34     | 13.8%                 | 4.0%                   | 11.3%                 | 1.8%                   | 1%                    | 1.1%                   |
| ≥35       | 9.6%                  | 10.5%                  | 10.4%                 | 1.9%                   | 0.9%                  | 0.8%                   |

279 Table 3: Prevalence of scabies and impetigo by age group during each visit

280

281 **Discussion**

282 The DerMalawi project has been working in Malawi since 2015. Over that time we noted  
 283 a marked increase in presentations to our service for scabies. When we switched to a  
 284 community rather than a clinic-based model, we found an extremely high community  
 285 prevalence of scabies of 15%. Over the course of three community outreach activities  
 286 the prevalence appeared to markedly decline, but whether this reduction is directly  
 287 related to our activities and treatment or not, remains unclear.

288 There is limited data on the prevalence of scabies in much of sub-Saharan Africa  
 289 although several recent studies suggest that it is common [19] and no recent data on  
 290 scabies in Malawi. The data from the DerMalawi project suggests that scabies is a major  
 291 problem in the area. We found especially high prevalences amongst children [20–22]

292 There was no change in scabies prevalence between July 2018 and October 2018  
 293 suggesting that at the coverage achieved the treatment of cases and a proportion of  
 294 their contacts was inadequate to affect scabies prevalence. This lack of change is likely  
 295 due to low population coverage. Whilst we switched from a clinic to a community-based  
 296 strategy, we still reached only about 50% of the population of our catchment area. Such

297 low coverage invariably leads to a large number of untreated scabies cases that might  
298 act as a reservoir for infection. In addition, most individuals received only a single dose  
299 of ivermectin limiting the efficacy of treatment for individual patients. All three visits were  
300 conducted during the dry season, so differences in prevalence seem unlikely to be  
301 related to seasonality [23]. Unlike research interventions that have been carried out in  
302 islands or confined populations and have maintained the effects for years [13], the  
303 activities reported here were carried out as part of a long term dermatological assistance  
304 programme and the patients in our target area, are surrounded by neighbouring  
305 communities with potentially high scabies rates. These surrounding areas therefore  
306 serve as a further reservoir from which reintroduction can occur.

307 The markedly reduced prevalence observed in our visit in April 2019 despite low  
308 treatment coverage, and in the absence of any effect seen previously, suggests that the  
309 observed reduction is unlikely to be due to treatment and more likely reflects changes in  
310 the population assessed at each time point. In keeping with this there were differences  
311 in both the demographic structure of the population seen in our final community visit and  
312 in the number of people seen at each screening site across each of our visits. We noted  
313 that in the final visit fewer people were able to enter the study because they said they  
314 were not affected and refused to be examined. What they find most difficult is getting  
315 undressed, and they refused to be examined arguing that they did not notice any itching  
316 or skin lesions. For these reasons it seems likely that the reduction seen is most likely  
317 a reflection of sampling bias not a true difference.

318 Scabies remains as an unresolved matter for global health, continues to be widespread  
319 and is responsible for intense suffering, health and social complications. New drugs,  
320 dissemination models and treatment and preventive strategies are needed to achieve  
321 better results. Targets for the establishment of scabies control programmes have been  
322 included in the new WHO NTD Roadmap 2021-2030 and our data suggests such a  
323 programme should be considered in Malawi alongside other national NTD programmes.

324

325

326

327



## 328   **References**

- 329   1.    GBD 2015 Disease and Injury Incidence and Prevalence Collaborators. Global,  
330       regional, and national incidence, prevalence, and years lived with disability for 310  
331       diseases and injuries, 1990-2015: a systematic analysis for the Global Burden of  
332       Disease Study 2015. *Lancet Lond Engl*. 2016 08;388(10053):1545–602.
- 333   2.    Chosidow O. Clinical practices. Scabies. *N Engl J Med*. 2006 Apr  
334       20;354(16):1718–27.
- 335   3.    Usha V, Gopalakrishnan Nair TV. A comparative study of oral ivermectin and  
336       topical permethrin cream in the treatment of scabies. *J Am Acad Dermatol*. 2000  
337       Feb;42(2 Pt 1):236–40.
- 338   4.    Wong L-C, Amega B, Barker R, Connors C, Dulla ME, Ninnal A, et al. Factors  
339       supporting sustainability of a community-based scabies control program. *Australas  
340       J Dermatol*. 2002 Nov;43(4):274–7.
- 341   5.    Romani L, Whitfeld MJ, Koroivueta J, Kama M, Wand H, Tikoduadua L, et al.  
342       Mass Drug Administration for Scabies Control in a Population with Endemic  
343       Disease. *N Engl J Med*. 2015 Dec 10;373(24):2305–13.
- 344   6.    Ly F, Caumes E, Ndaw CAT, Ndiaye B, Mahé A. Ivermectin versus benzyl  
345       benzoate applied once or twice to treat human scabies in Dakar, Senegal: a  
346       randomized controlled trial. *Bull World Health Organ*. 2009 Jun;87(6):424–30.
- 347   7.    Hay RJ, Steer AC, Chosidow O, Currie BJ. Scabies: a suitable case for a global  
348       control initiative. *Curr Opin Infect Dis*. 2013 Apr;26(2):107–9.
- 349   8.    Engelman D, Kiang K, Chosidow O, McCarthy J, Fuller C, Lammie P, et al.  
350       Toward the global control of human scabies: introducing the International Alliance  
351       for the Control of Scabies. *PLoS Negl Trop Dis*. 2013;7(8):e2167.
- 352   9.    Currie BJ, McCarthy JS. Permethrin and ivermectin for scabies. *N Engl J Med*.  
353       2010 Feb 25;362(8):717–25.
- 354   10.   Mounsey KE, McCarthy JS. Treatment and control of scabies. *Curr Opin Infect  
355       Dis*. 2013 Apr;26(2):133–9.
- 356   11.   La Vincente S, Kearns T, Connors C, Cameron S, Carapetis J, Andrews R.  
357       Community management of endemic scabies in remote aboriginal communities of  
358       northern Australia: low treatment uptake and high ongoing acquisition. *PLoS Negl  
359       Trop Dis*. 2009 May 26;3(5):e444.
- 360   12.   Lawrence G, Leafasia J, Sheridan J, Hills S, Wate J, Wate C, et al. Control of  
361       scabies, skin sores and haematuria in children in the Solomon Islands: another role  
362       for ivermectin. *Bull World Health Organ*. 2005 Jan;83(1):34–42.
- 363   13.   Marks M, Romani L, Sokana O, Neko L, Harrington R, Nasi T, et al. Prevalence of  
364       scabies and impetigo three years after mass drug administration with ivermectin  
365       and azithromycin. *Clin Infect Dis Off Publ Infect Dis Soc Am*. 2019 May 25;

- 366 14. Kearns TM, Speare R, Cheng AC, McCarthy J, Carapetis JR, Holt DC, et al.  
367 Impact of an Ivermectin Mass Drug Administration on Scabies Prevalence in a  
368 Remote Australian Aboriginal Community. *PLoS Negl Trop Dis*. 2015  
369 Oct;9(10):e0004151.
- 370 15. Taplin D, Porcelain SL, Meinking TL, Athey RL, Chen JA, Castellero PM, et al.  
371 Community control of scabies: a model based on use of permethrin cream. *Lancet*  
372 *Lond Engl*. 1991 Apr 27;337(8748):1016–8.
- 373 16. Evans DS, Alphonsus K, Umaru J, Eigege A, Miri E, Mafuyai H, et al. Status of  
374 Onchocerciasis transmission after more than a decade of mass drug administration  
375 for onchocerciasis and lymphatic filariasis elimination in central Nigeria:  
376 challenges in coordinating the stop MDA decision. *PLoS Negl Trop Dis*. 2014  
377 Sep;8(9):e31113.
- 378 17. Mohammed KA, Deb RM, Stanton MC, Molyneux DH. Soil transmitted helminths  
379 and scabies in Zanzibar, Tanzania following mass drug administration for  
380 lymphatic filariasis--a rapid assessment methodology to assess impact. *Parasit*  
381 *Vectors*. 2012 Dec 21;5:299.
- 382 18. Romani L, Whitfeld MJ, Koroivueta J, Kama M, Wand H, Tikoduadua L, et al.  
383 Mass Drug Administration for Scabies Control in a Population with Endemic  
384 Disease. *N Engl J Med*. 2015 Dec 10;373(24):2305–13.
- 385 19. Azene AG, Aragaw AM, Wassie GT. Prevalence and associated factors of scabies  
386 in Ethiopia: systematic review and Meta-analysis. *BMC Infect Dis* [Internet].  
387 2020;20(1). Available from: <https://dx.doi.org/10.1186/s12879-020-05106-3>
- 388 20. Engelman D, Steer AC. Control Strategies for Scabies. *Trop Med Infect Dis*. 2018  
389 Sep 5;3(3).
- 390 21. Mason DS, Marks M, Sokana O, Solomon AW, Mabey DC, Romani L, et al. The  
391 Prevalence of Scabies and Impetigo in the Solomon Islands: A Population-Based  
392 Survey. Vinetz JM, editor. *PLoS Negl Trop Dis*. 2016 Jun 27;10(6):e0004803.
- 393 22. Tikoduadua L, Kama M, Romani L, Steer AC, Tuicakau M, Whitfeld MJ, et al.  
394 The Epidemiology of Scabies and Impetigo in Relation to Demographic and  
395 Residential Characteristics: Baseline Findings from the Skin Health Intervention  
396 Fiji Trial. *Am J Trop Med Hyg*. 2017 Sep 7;97(3):845–50.
- 397 23. Armitage EP, Senghore E, Darboe S, Barry M, Camara J, Bah S, et al. High  
398 burden and seasonal variation of paediatric scabies and pyoderma prevalence in  
399 The Gambia: A cross-sectional study. Taylan Ozkan A, editor. *PLoS Negl Trop*  
400 *Dis*. 2019 Oct 14;13(10):e0007801.

401

402

403

404

405 **Acknowledgments.**

406 We are extremely grateful to the Missionary Community San Paul the apostle MCSPA  
407 for providing accommodation and support for the DerMalawi project, especially Mr. Brian  
408 Odhiambo who supports all the dermatological work carried out by the DerMalawi project  
409 and F. Manuel Hernandez, head of the parish. We are also extremely grateful to all the  
410 members of the community and community leaders for their participation and support of  
411 the DerMalawi project over many years.
